# Supplementary material for: Simultaneous Deletion of Virulence Factors and Insertion of Antigens into the Infectious Laryngotracheitis Virus Using NHEJ-CRISPR/Cas9 and Cre–Lox System for Construction of a Stable Vaccine Vector
Source: PubMed Central journal article supplement (PMC6963826; doi:10.3390/vaccines7040207), 2019-12-05
Supplement: vaccines-07-00207-s001.pdf [file vaccines-07-00207-s001.pdf]

Related to Figure 4

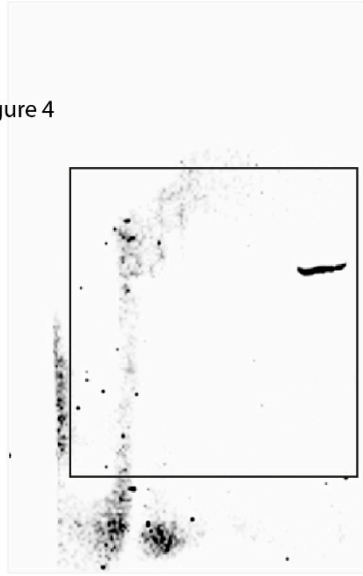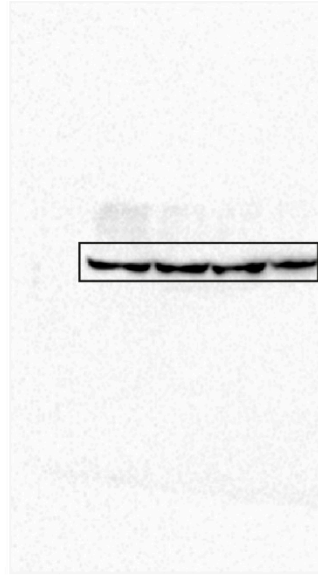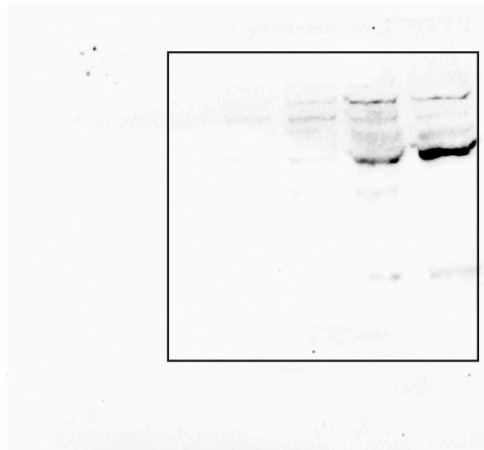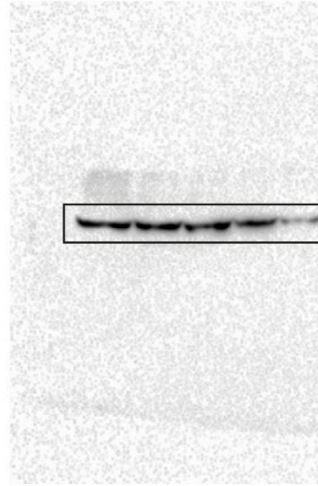

Related to Figure 4

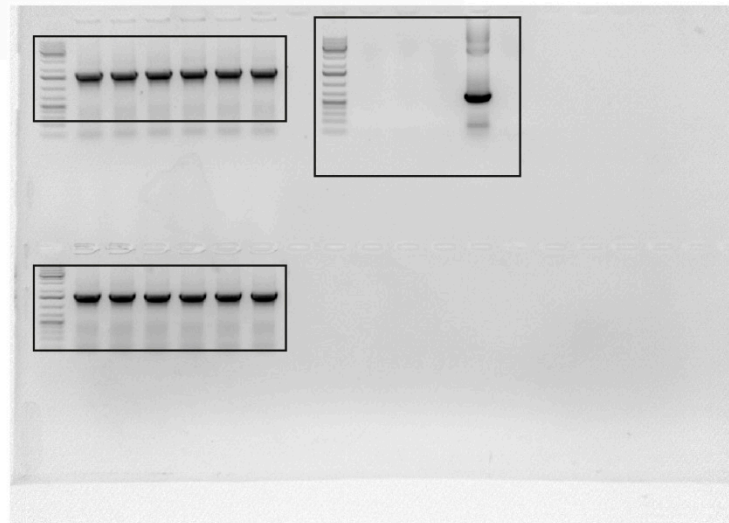

**Table S1.** Primers used in this study.

| # | Primer      | Sequence                           | Purpose                                                   | Reference          |
|---|-------------|------------------------------------|-----------------------------------------------------------|--------------------|
| 1 | sg137152F   | CACCGTAGCCTCGCCGAAGCTCGA           | For cutting UL4 gene region                               | This study         |
|   | sg137152R   | AAACTCGAGTTCGGGCGAGGCTAC           |                                                           |                    |
| 2 | sg136416F   | CACCGTCAGCGGGTACACTTTATA           | For cutting UL47/US4 intergenic region                    | This study         |
|   | sg136416R   | AAACTATAAAGTGTACCCGCTGAC           |                                                           |                    |
| 3 | sgA-Fwd     | CACCGAGATCGAGTGCCGCATCAC           | For releasing expression cassettes from the donor plasmid | 10.1093/nar/gkw064 |
|   | sgA-Rev     | AAACGTGATGCGGCACTCGATCTC           |                                                           |                    |
| 4 | sgB-Fwd     | CACCGGCAGCCGAAGCAACATGGG           | For releasing expression cassette of F gene (MCS1)        | 10.1242/dev.099085 |
|   | sgB-Rev     | AAACCCCATGTTGCTTCGGCTGCC           |                                                           |                    |
| 5 | dsREDClon2F | CCGGAATTCTCCACCATGGCCTCCTCCGAGGACG | mRFP gene amplification primers for MCS2                  | This Study         |
|   | dsREDClon2R | GTACTCTAGAGGCGCCGGTGGAGTGCC        |                                                           |                    |
| 6 | FClon1F     | CTAGCTAGCTCCACCATGGGCTCCAAACTTTCTA | F gene amplification primers for MCS1                     | This Study         |
|   | FClon1R     | GCCGGTACCTGCTCTTGTAGTGGCTCT        |                                                           |                    |
| 7 | CMV-MCS1-F  | AGAACCCACTGCTTACTGGCTT             | Internal control primer set for MCS1                      | This Study         |
|   | CMV-MCS1-R  | AACTAGAAGGCACAGTCGAGGC             |                                                           |                    |
| 8 | pEF-MCS2-F  | TCAAGCCTCAGACAGTGGTTCA             | Internal control primer set for MCS2                      | This Study         |
|   | pEF-MCS2-R  | TTCCGCCTCAGAAGCCATAGAG             |                                                           |                    |
| 9 | IR/US4F     | TAAAGCCGGTGATAGACGAGCC             | Primer set for correction of recombinant virus            | This Study         |
|   | IR/US4R     | TTAGCACAGACACGCAAACCAC             |                                                           |                    |
